# Supplementary material for: Sex-Specific Embryonic Gene Expression in Species with Newly Evolved Sex Chromosomes
Source: PubMed Central journal article supplement (PMC3923672; doi:10.1371/journal.pgen.1004159), 2014-02-13

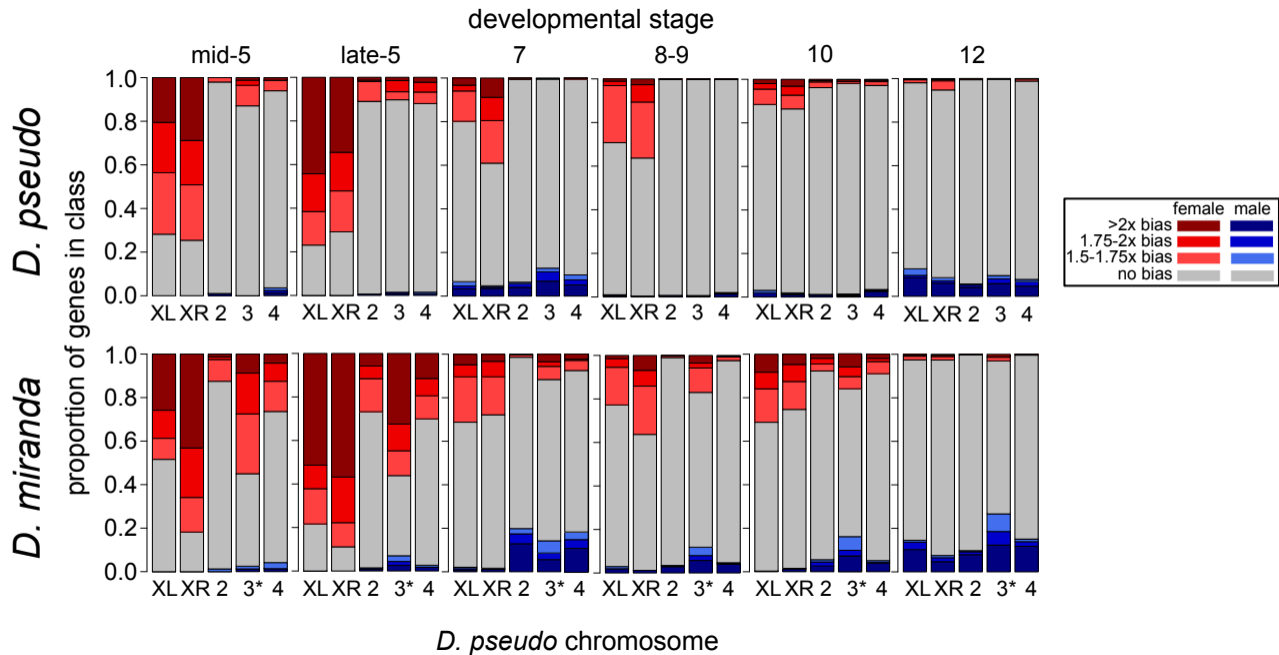

Supplement: pgen.1004159.s002.pdf [file pgen.1004159.s002.pdf]
