# Supplementary material for: Sex-Specific Embryonic Gene Expression in Species with Newly Evolved Sex Chromosomes
Source: PubMed Central journal article supplement (PMC3923672; doi:10.1371/journal.pgen.1004159), 2014-02-13

# *D. pseudoobscura*

# *D. miranda*

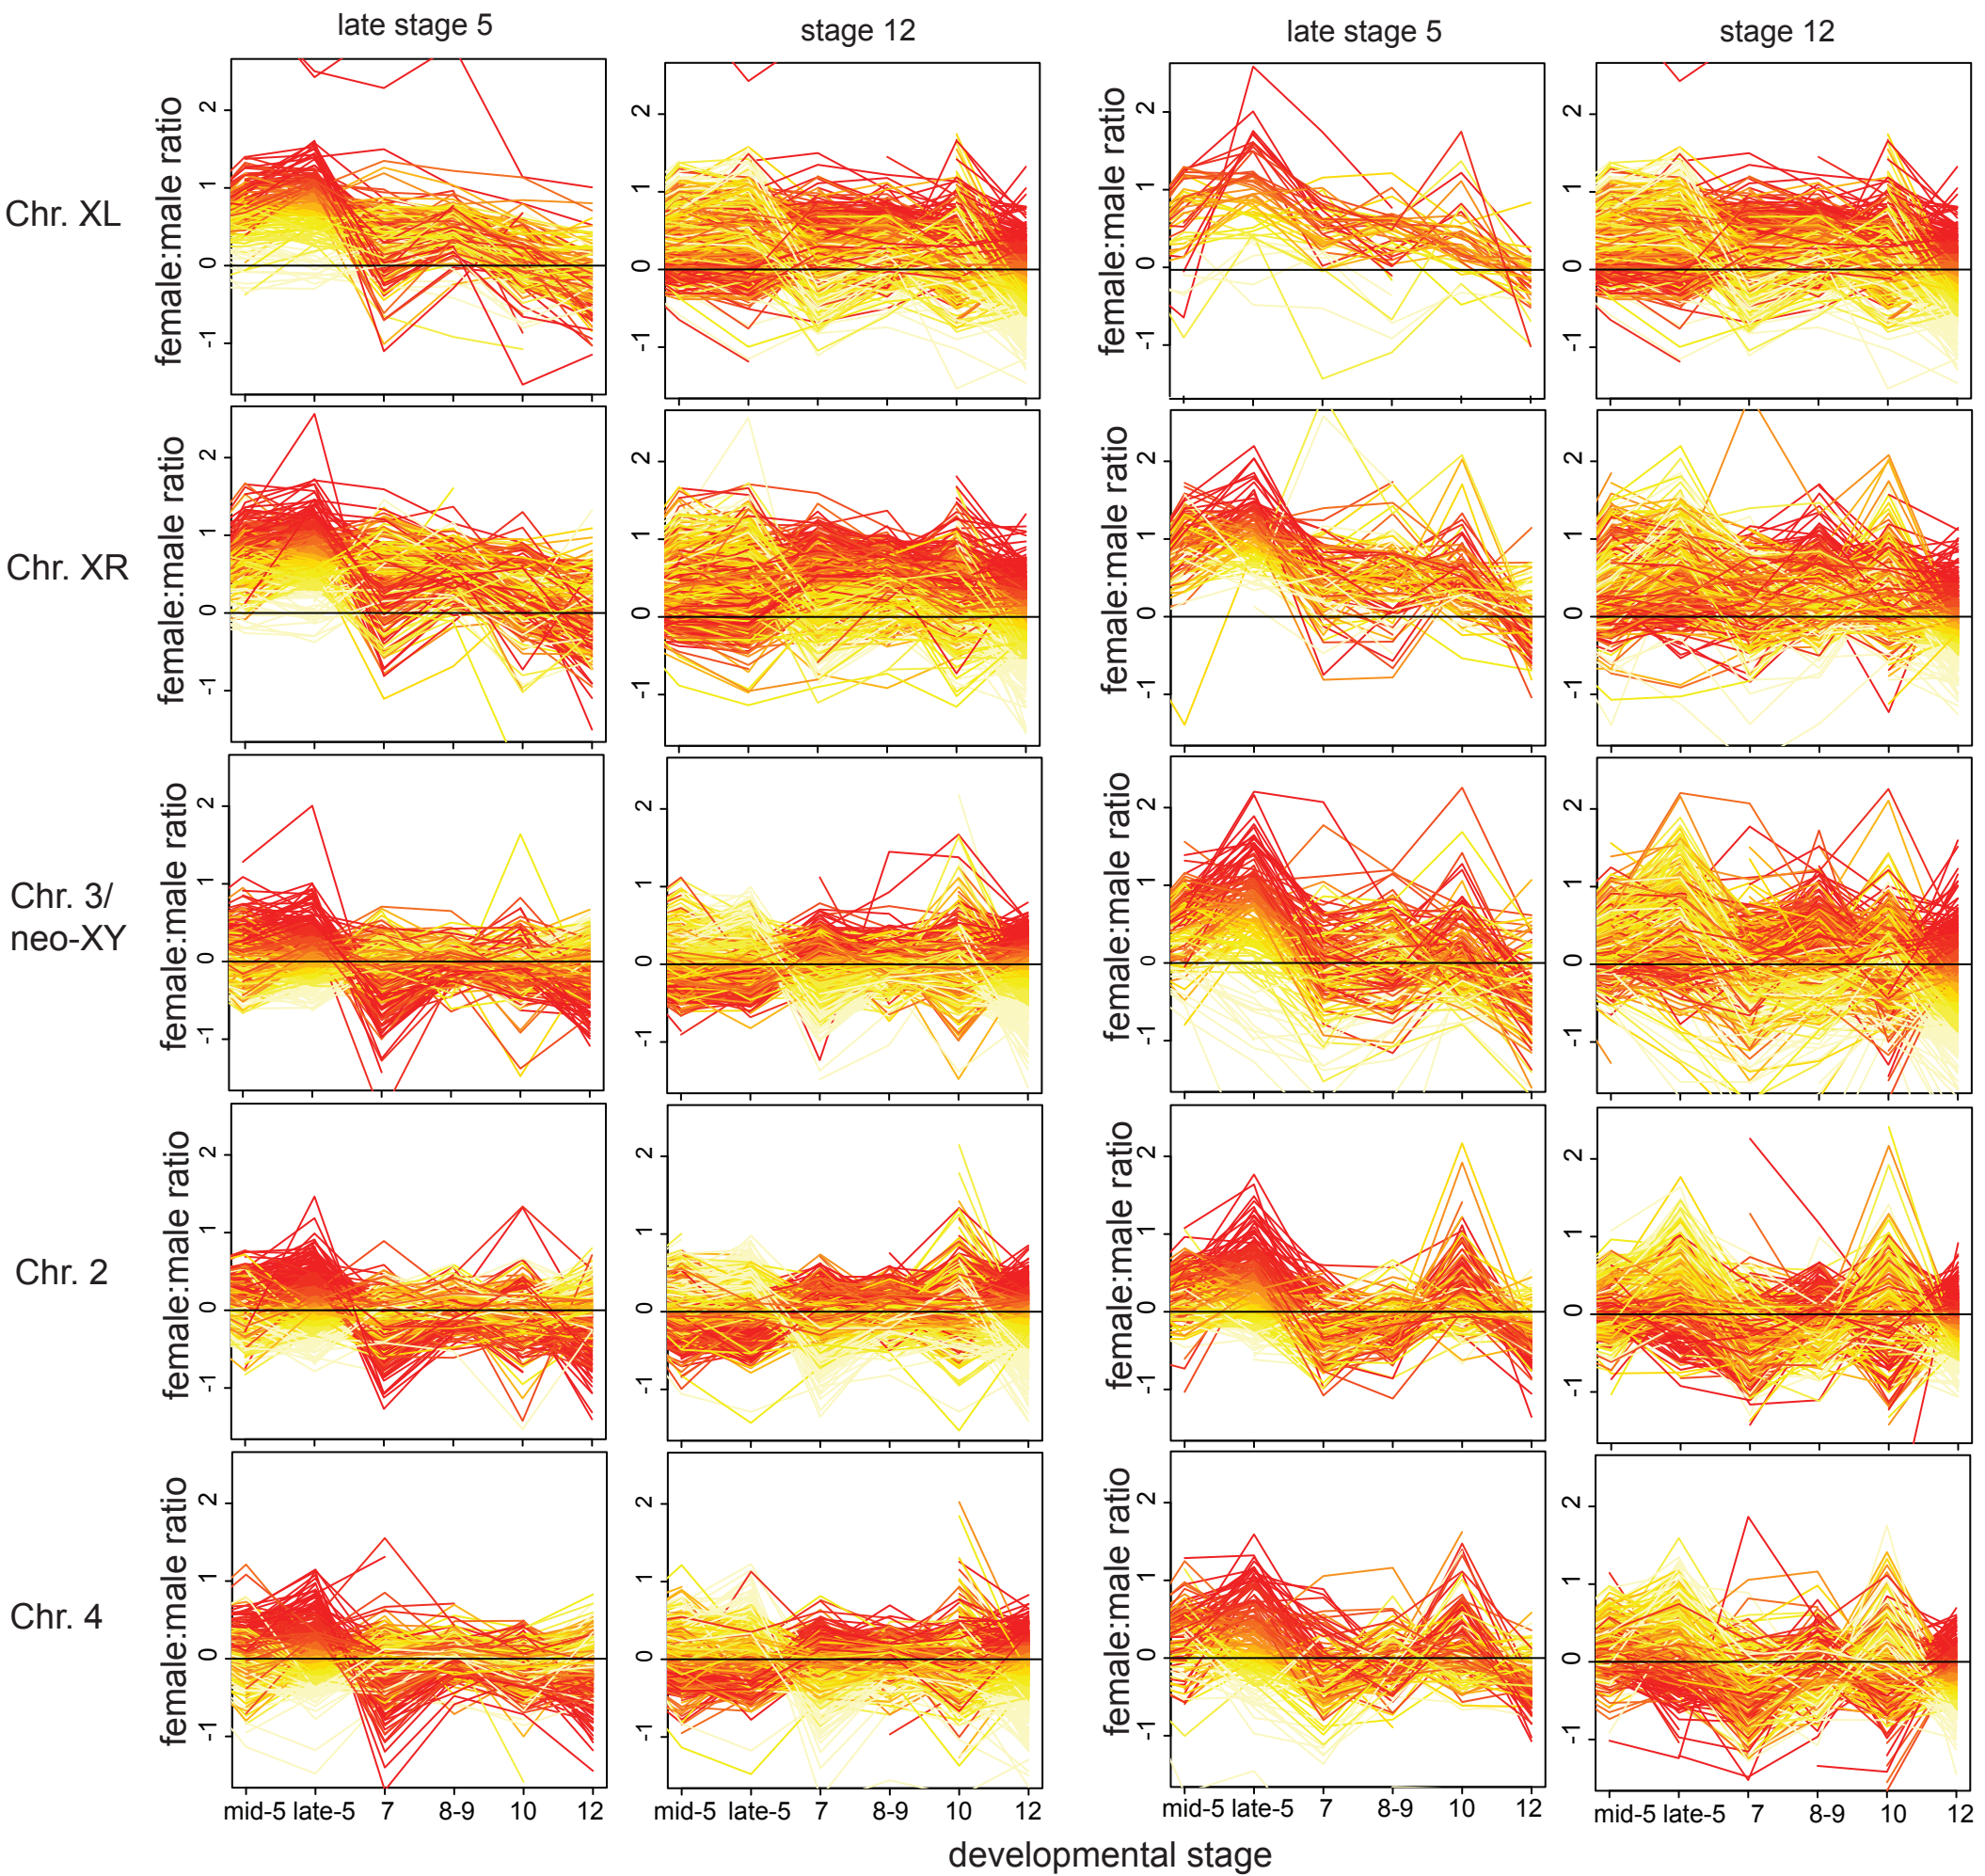

Supplement: pgen.1004159.s003.pdf [file pgen.1004159.s003.pdf]
