# Supplementary material for: Sex-Specific Embryonic Gene Expression in Species with Newly Evolved Sex Chromosomes
Source: PLoS Genet. 2014 Feb 13;10(2):e1004159. doi: 10.1371/journal.pgen.1004159 (PMC3923672; doi:10.1371/journal.pgen.1004159)
Supplement: Table S9 — Comparing allele-specific expression from the maternal X chromosome in female and male D. pseudoobscura and D. miranda. This shows the mean transcript level from the maternal allele for males and females of both species at each stage. 95% bootstrap confidence intervals were calculated for the mean by resampling genes with replacement, taking the mean, and finding the 2.5% and 97.5% quantiles over bootstrap simulations. Highlighted in yellow are those values where the male maternal allele is significantly higher (falls above the 97.5% confidence interval) than the maternal allele in the female. Whether looking over the X chromosomes combined and the autosomes combined (A) or each chromosome separately (B), D. miranda is delayed one stage relative to D. pseudoobscura as to when males have a significantly higher transcript level from the maternal alleles than do females, which indicates a delay in activation of higher male transcription relative to the female, i.e. the onset of MSL-mediated dosage compensation. (XLSX) [file pgen.1004159.s014.xlsx]

## Sheet: S9
TABLE S9- COMPARING ALLELE-SPECIFIC EXPRESSION FROM THE MATERNAL X CHROMOSOME IN FEMALE AND MALE D. pseudoobscura AND D. miranda
A. X chromosomes pooled, autosomes pooled
		D. PSEUDOOBSCURA						D.MIRANDA
		female			male			female			male
chr.	stage	mean	0.025	0.975	mean	0.025	0.975	mean	0.025	0.975	mean	0.025	0.975
X	2	0.210249	0.156522	0.273971	0.212005	0.158727	0.271712	0.184056	0.114637	0.273997	0.157153	0.0963865	0.241956
X	4	0.179098	0.13967	0.221893	0.150342	0.114733	0.192147	0.151644	0.10672	0.204462	0.184021	0.128576	0.251219
X	mid-5	3.00667	2.2648	3.82247	3.75429	2.69256	5.04897	1.86835	1.33916	2.46584	1.9727	1.42649	2.57862
X	late-5	3.88218	2.69817	5.10526	3.97237	2.734	5.4494	2.32501	1.68991	3.03516	2.73586	1.95178	3.61988
X	7	4.42731	3.13872	5.92896	7.13956	5.19139	9.47388	5.01378	3.06304	8.00118	5.37389	3.93813	6.96243
X	8-9	4.46111	3.24766	6.10771	6.67993	4.86944	8.90855	4.73508	3.39505	6.40549	7.26403	5.47675	9.31163
X	10	10.0672	7.57866	13.217	13.9217	10.9352	17.3795	6.98186	5.42993	8.77189	11.5745	8.44366	15.2696
X	12	13.5309	8.84601	22.158	28.6425	19.4438	43.5496	8.19886	6.07219	10.7286	15.917	12.2445	20.0252
3/neo-XY	2	0.235428	0.172588	0.301035	0.23707	0.174073	0.3107	0.147935	0.0721162	0.273068	0.313605	0.140105	0.606052
3/neo-XY	4	0.257047	0.19339	0.322377	0.217165	0.157667	0.280847	0.189939	0.0968219	0.352145	0.368973	0.185934	0.686204
3/neo-XY	mid-5	4.87033	3.2569	6.95958	4.54864	3.00858	6.18449	6.04113	3.9195	8.65993	6.45505	4.27926	8.95751
3/neo-XY	late-5	5.49149	3.66486	7.64673	4.70372	3.10253	6.68705	5.74208	3.80296	8.00914	5.4536	3.78151	7.38926
3/neo-XY	7	6.72477	4.3452	9.42486	7.10906	4.88277	9.67533	7.57144	5.38094	10.1707	8.94502	6.6311	11.5097
3/neo-XY	8-9	6.89337	4.52217	9.68851	6.89324	4.70087	9.30473	9.3081	6.70683	12.6764	11.455	8.627	14.6005
3/neo-XY	10	16.6461	11.1553	24.8022	14.6249	9.99326	21.8061	11.2714	8.36188	14.8821	18.8258	14.4636	24.0076
3/neo-XY	12	21.0802	14.5114	30.4019	22.0029	16.0911	29.7302	16.781	12.9027	21.3782	24.5377	19.5515	30.3227
auto	2	0.216297	0.147443	0.307816	0.191622	0.129634	0.261931	0.501048	0.137963	1.12384	0.503392	0.149228	1.07084
auto	4	0.229981	0.156929	0.330382	0.218475	0.136328	0.334149	0.555785	0.171196	1.16154	0.58336	0.168314	1.22861
auto	mid-5	4.14149	3.19164	5.28754	4.06754	3.03275	5.11772	4.61283	3.44401	5.94468	4.164	3.08861	5.36662
auto	late-5	4.93627	3.8072	6.21372	4.15122	3.18946	5.2726	5.27141	3.94393	6.80513	4.98177	3.6059	6.49773
auto	7	5.84051	4.49869	7.39634	6.16348	4.8059	7.73112	7.62699	5.83709	9.68674	7.82869	6.02133	9.8079
auto	8-9	5.8921	4.59452	7.43139	6.15815	4.89713	7.54838	8.63177	6.65428	10.8876	9.34243	7.29489	11.6874
auto	10	13.8016	10.4207	17.8593	12.0042	9.61923	14.5866	11.2155	8.70047	14.4723	11.6167	8.69802	15.566
auto	12	19.6429	12.8949	27.8763	21.7673	14.5126	31.8778	13.7857	10.3313	18.1033	14.3765	11.3043	18.2156
B. Each chromosome separately
		D. PSEUDOOBSCURA						D.MIRANDA
		female			male			female			male
chr.	stage	mean	0.025	0.975	mean	0.025	0.975	mean	0.025	0.975	mean	0.025	0.975
XL	2	0.259848	0.165022	0.371755	0.304084	0.198967	0.430953	0.120021	0.0635029	0.185881	0.0733865	0.0343367	0.121675
XL	4	0.205484	0.142193	0.277307	0.188213	0.125968	0.261992	0.101117	0.055926	0.154452	0.110377	0.0626358	0.166171
XL	mid-5	2.51329	1.63854	3.5115	2.92196	1.89855	4.19167	1.74564	0.867742	2.91876	1.94445	1.04153	3.02615
XL	late-5	2.65037	1.6841	3.85517	2.43696	1.49641	3.60664	1.95651	1.03659	3.05932	2.34677	1.20045	3.81408
XL	7	2.62512	1.80704	3.71799	5.05529	3.32997	7.04513	3.15904	1.96031	4.59411	4.15049	2.4611	6.20756
XL	8-9	2.88057	1.8682	4.32487	4.38842	3.11868	6.12022	3.41447	2.24916	4.76868	5.84434	3.7358	8.3436
XL	10	6.9615	5.34458	8.50548	9.81538	7.67211	12.1694	4.73111	3.45175	6.1583	7.96056	5.43842	10.94
XL	12	7.15024	5.3896	9.22363	17.1451	13.2478	21.6418	5.81498	3.81977	8.17877	13.0451	8.89693	18.1424
XR	2	0.177785	0.11676	0.242354	0.151735	0.10848	0.207361	0.227469	0.116995	0.369771	0.213943	0.117559	0.353527
XR	4	0.161827	0.114812	0.218348	0.125553	0.0848667	0.169625	0.185899	0.119134	0.265847	0.23395	0.147983	0.338153
XR	mid-5	3.3296	2.27584	4.51194	4.2991	2.71958	6.57198	1.95155	1.3368	2.63082	1.99184	1.33458	2.73202
XR	late-5	4.68846	3.03512	6.6604	4.97737	3.27423	7.155	2.57484	1.74794	3.49117	2.99965	1.97559	4.16692
XR	7	5.60693	3.43224	8.1202	8.50381	5.64938	12.0638	6.27123	3.22098	11.2459	6.20331	4.22867	8.46435
XR	8-9	5.49564	3.52623	7.89283	8.17983	5.43869	12.1798	5.6304	3.58521	8.24529	8.22653	5.58785	11.2133
XR	10	12.1001	8.34969	16.9876	16.6095	11.7213	23.2573	8.50779	6.03701	11.4127	14.0245	9.20372	20.1135
XR	12	17.7073	10.4138	30.8247	36.168	21.3631	60.6277	9.81505	6.55609	13.79	17.864	12.7011	23.7117
3/neo-XY	2	0.235428	0.17413	0.308113	0.23707	0.168547	0.310032	0.147935	0.0721162	0.273068	0.313605	0.140105	0.606052
3/neo-XY	4	0.257047	0.189525	0.326844	0.217165	0.155701	0.282453	0.189939	0.0968219	0.352145	0.368973	0.185934	0.686204
3/neo-XY	mid-5	4.87033	3.32189	6.83958	4.54864	3.13117	6.37073	6.04113	3.9195	8.65993	6.45505	4.27926	8.95751
3/neo-XY	late-5	5.49149	3.78538	7.41253	4.70372	3.09684	6.74423	5.74208	3.80296	8.00914	5.4536	3.78151	7.38926
3/neo-XY	7	6.72477	4.56049	9.27018	7.10906	4.96649	9.82864	7.57144	5.38094	10.1707	8.94502	6.6311	11.5097
3/neo-XY	8-9	6.89337	4.55591	9.48372	6.89324	4.87497	9.57665	9.3081	6.70683	12.6764	11.455	8.627	14.6005
3/neo-XY	10	16.6461	10.8838	24.3143	14.6249	9.62564	21.5231	11.2714	8.36188	14.8821	18.8258	14.4636	24.0076
3/neo-XY	12	21.0802	14.735	30.022	22.0029	16.1214	29.5073	16.781	12.9027	21.3782	24.5377	19.5515	30.3227
2	2	0.213629	0.146698	0.287882	0.206222	0.148326	0.280375	0.180825	0.11956	0.250505	0.173549	0.112487	0.245889
2	4	0.229258	0.155192	0.322	0.213692	0.138644	0.331128	0.211731	0.137467	0.297247	0.231781	0.145388	0.33393
2	mid-5	4.8202	3.30295	6.49209	4.75866	3.17245	6.43079	4.22078	2.69725	6.05755	3.55333	2.29305	5.10762
2	late-5	5.58897	3.86928	7.50358	4.69517	3.14939	6.59965	4.67541	2.98465	6.72858	4.32797	2.55735	6.55621
2	7	6.27454	4.26021	8.68621	6.76924	4.75475	9.19234	7.17063	4.80676	10.1311	7.05622	4.7497	9.80586
2	8-9	6.43437	4.45492	8.82707	6.81326	4.84666	9.18559	8.86698	5.99053	12.4991	9.54753	6.67913	13.117
2	10	16.1193	10.1447	23.4338	13.4172	9.65278	18.0328	12.7319	8.68342	18.2198	13.7372	8.87119	20.6167
2	12	21.4724	11.3933	35.8119	23.327	12.665	39.4446	15.776	10.1716	23.0988	15.749	10.9659	22.1165
4	2	0.219262	0.111257	0.403439	0.175393	0.0831846	0.315379	0.930578	0.102125	2.35126	0.945827	0.136162	2.27457
4	4	0.230784	0.115504	0.418783	0.223793	0.099366	0.439779	1.01728	0.146766	2.42036	1.05495	0.124851	2.56314
4	mid-5	3.38705	2.17503	4.77417	3.29929	2.19417	4.56758	5.1387	3.424	7.14937	4.98312	3.25832	7.00644
4	late-5	4.21074	2.86925	5.62243	3.54657	2.53018	4.81089	6.07086	4.07116	8.3805	5.85874	3.92441	8.04066
4	7	5.35804	3.64477	7.52073	5.49014	3.68742	7.53065	8.17311	5.75349	10.8892	8.86482	6.24048	11.8039
4	8-9	5.28933	3.66986	7.30975	5.42994	4.02782	7.26279	8.31627	6.02752	10.7997	9.06734	6.47703	11.9346
4	10	11.2252	8.13543	15.0536	10.4335	7.59405	13.8621	9.18153	7.21475	11.3426	8.77249	6.94339	10.7841
4	12	17.6093	10.8326	26.9469	20.0336	12.5385	31.0023	11.1161	8.23582	14.4247	12.5355	9.63725	15.9069
TABLE S9- Comparing allele-specific expression from the maternal X chromosome in female and male D. pseudoobscura and D. miranda. This shows the mean transcript level from the maternal allele for males and females of both species at each stage. 95% bootstrap confidence intervals were calculated for the mean by resampling genes with replacement, taking the mean, and finding the 2.5% and 97.5% quan…
